# Supplementary material for: A Novel Sodium-Potassium Anode Supported by Fluorinated Aluminum Foam
Source: Preprints.org preprint supplement (doi:10.20944/preprints202310.1650.v1), 2023-10-26
Supplement: Supplementary file 4 [file supplementary]

## **A novel sodium-potassium anode supported by fluorinated aluminum foam**

**Jin Lou 1,*, Jingan Zhou 2, Xiaosong Ma 2,** **Kanghua Chen 1, Songyi Chen1,**

1 Light Alloy Metal Research Institute, Central South University, Changsha 410083, China; jinlou@csu.edu.cn (J.L.); khchen@csu.edu.cn (K.C.); sychen08@csu.edu.cn (S.C.)

2 Hunan Provincial Key Laboratory of Carbon Neutrality and Intelligent Energy, School of Resources & Environment, Hunan University of Technology and Business, Changsha 410205, [China;17373564507@163.com](mailto:China;17373564507@163.com) (J.Z.); [ma15367552578@163.com](mailto:ma15367552578@163.com) (X.M.);

*Correspondence: jinlou@csu.edu.cn

**
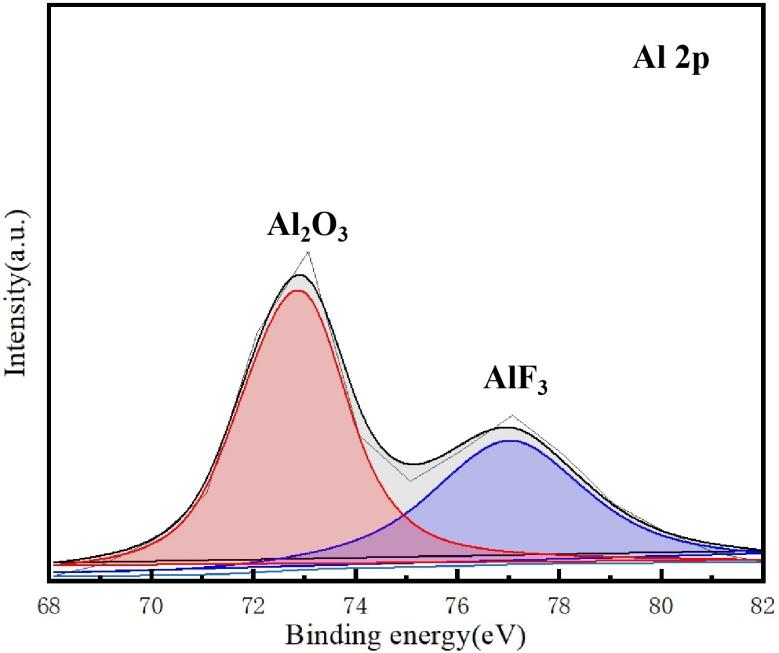
**

Figure S1 X-ray photoelectron spectroscopy (XPS) spectra of the Al element of FAF electrode.


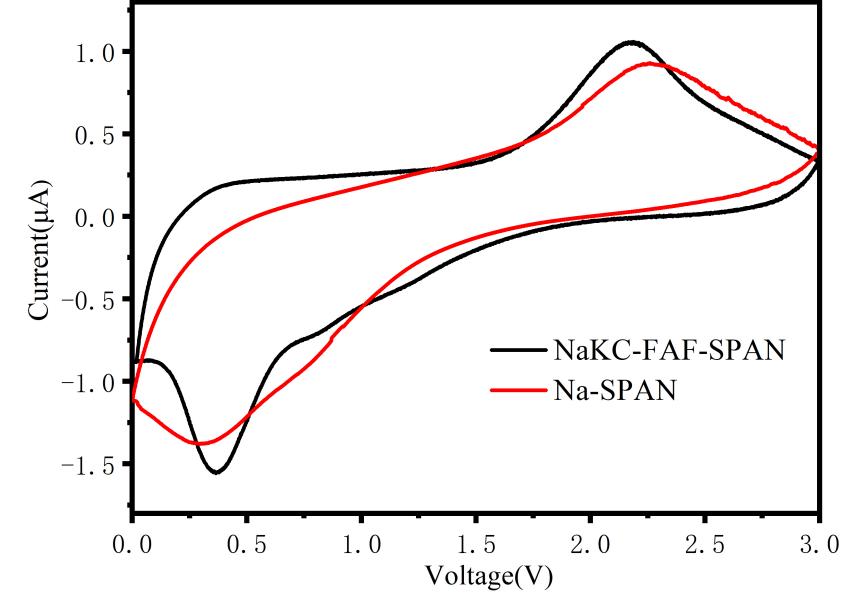


Figure S2 The CV curves of Na-SPAN/NaKC-FAF-SPAN at 0.1 mV s-1

.
